# Supplementary material for: A series of asymmetric and symmetric porphyrin derivatives: one-pot synthesis, nonlinear optical and optical limiting properties
Source: Royal Society of Chemistry journal article supplement (doi:10.1039/d1nj02632a), 2021-01-01
Supplement: d1nj02632a1.pdf [file d1nj02632a1.pdf]

# **A series of asymmetric and symmetric porphyrin derivatives: one-pot synthesis, nonlinear optical and optical limiting properties**

Changjiang Bao,<sup>a</sup> Yanwei Li,<sup>\*a</sup> Yanhui Li,<sup>a</sup> Zhenjun Si,<sup>a</sup> Yanru Zhang,<sup>a</sup>

Changshun Chen,<sup>a</sup> Lei Wang,<sup>a</sup> Qian Duan<sup>\*ab</sup>

<sup>a</sup>School of Materials Science and Engineering, Changchun University of Science and Technology, Changchun, 130022, China

<sup>b</sup> Engineering Research Center of Optoelectronic Functional Materials, Ministry of Education, Changchun, 130022, China

Correspondence E-mail: liyanwei@cust.edu.cn; duanqian88@hotmail.com

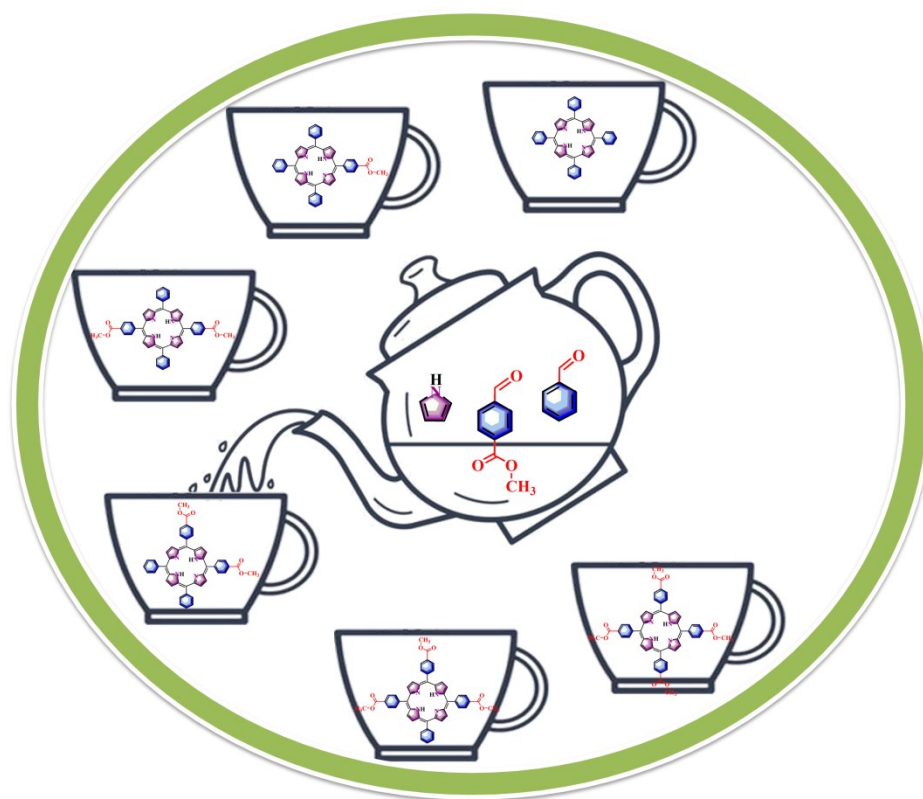

Fig. S1 One-pot synthesis of asymmetric and symmetric porphyrin derivatives (I-VI).

Table S1. Atomic coordinates ( $\times 10^4$ ) and equivalent isotropic displacement parameters ( $\text{\AA}^2 \times 10^3$ ).  
 $U(\text{eq})$  is defined as one third of the trace of the orthogonalized  $U_{ij}$  tensor.

|       | x        | y       | z        | $U(\text{eq})$ |
|-------|----------|---------|----------|----------------|
| C(1)  | -695(4)  | 4323(2) | 3291(2)  | 29(1)          |
| C(2)  | 954(3)   | 3592(2) | 3624(2)  | 23(1)          |
| C(3)  | 3111(3)  | 3973(2) | 4047(2)  | 26(1)          |
| C(4)  | 4602(3)  | 3266(2) | 4324(2)  | 25(1)          |
| C(5)  | 3966(3)  | 2167(2) | 4184(2)  | 22(1)          |
| C(6)  | 1798(3)  | 1790(2) | 3763(2)  | 26(1)          |
| C(7)  | 306(3)   | 2496(2) | 3481(2)  | 28(1)          |
| C(8)  | 5622(3)  | 1417(2) | 4449(2)  | 22(1)          |
| C(9)  | 6833(3)  | 1527(2) | 5534(2)  | 23(1)          |
| C(10) | 6315(4)  | 2210(2) | 6425(2)  | 29(1)          |
| C(11) | 7809(4)  | 2131(2) | 7328(2)  | 29(1)          |
| C(12) | 9247(3)  | 1400(2) | 6993(2)  | 23(1)          |
| C(13) | 11077(3) | 1145(2) | 7712(2)  | 23(1)          |
| C(14) | 11560(4) | 1648(2) | 8881(2)  | 28(1)          |
| C(15) | 10160(4) | 1447(2) | 9533(2)  | 37(1)          |
| C(16) | 10604(5) | 1950(3) | 10606(2) | 48(1)          |
| C(17) | 12453(5) | 2642(3) | 11040(2) | 52(1)          |
| C(18) | 13874(5) | 2843(3) | 10407(2) | 54(1)          |
| C(19) | 13427(4) | 2347(2) | 9330(2)  | 41(1)          |
| C(20) | 5950(3)  | 718(2)  | 3572(2)  | 22(1)          |
| C(21) | 4874(3)  | 644(2)  | 2450(2)  | 29(1)          |
| C(22) | 5789(3)  | -70(2)  | 1855(2)  | 30(1)          |
| C(23) | 7475(3)  | -462(2) | 2584(2)  | 23(1)          |
| C(24) | -1516(4) | 6105(2) | 3414(2)  | 44(1)          |
| N(1)  | 8605(3)  | 1029(1) | 5898(1)  | 22(1)          |
| N(2)  | 7498(3)  | 22(1)   | 3620(1)  | 21(1)          |
| O(1)  | 9(3)     | 5352(1) | 3705(1)  | 37(1)          |
| O(2)  | -2469(3) | 4023(2) | 2728(2)  | 50(1)          |
| O(3)  | 8660(19) | 4630(5) | 9177(6)  | 379(7)         |

Table S2. Bond lengths [Å] and angles [deg].

---

|               |          |
|---------------|----------|
| C(1)-O(2)     | 1.201(3) |
| C(1)-O(1)     | 1.336(3) |
| C(1)-C(2)     | 1.491(3) |
| C(2)-C(3)     | 1.386(3) |
| C(2)-C(7)     | 1.388(3) |
| C(3)-C(4)     | 1.384(3) |
| C(3)-H(3)     | 0.9300   |
| C(4)-C(5)     | 1.391(3) |
| C(4)-H(4)     | 0.9300   |
| C(5)-C(6)     | 1.392(3) |
| C(5)-C(8)     | 1.496(3) |
| C(6)-C(7)     | 1.385(3) |
| C(6)-H(6)     | 0.9300   |
| C(7)-H(7)     | 0.9300   |
| C(8)-C(20)    | 1.396(3) |
| C(8)-C(9)     | 1.408(3) |
| C(9)-N(1)     | 1.367(3) |
| C(9)-C(10)    | 1.450(3) |
| C(10)-C(11)   | 1.344(3) |
| C(10)-H(10)   | 0.9300   |
| C(11)-C(12)   | 1.451(3) |
| C(11)-H(11)   | 0.9300   |
| C(12)-N(1)    | 1.369(3) |
| C(12)-C(13)   | 1.407(3) |
| C(13)-C(23)#1 | 1.399(3) |
| C(13)-C(14)   | 1.493(3) |
| C(14)-C(19)   | 1.387(3) |
| C(14)-C(15)   | 1.388(3) |
| C(15)-C(16)   | 1.385(3) |
| C(15)-H(15)   | 0.9300   |
| C(16)-C(17)   | 1.371(4) |
| C(16)-H(16)   | 0.9300   |
| C(17)-C(18)   | 1.379(5) |
| C(17)-H(17)   | 0.9300   |
| C(18)-C(19)   | 1.386(4) |
| C(18)-H(18)   | 0.9300   |
| C(19)-H(19)   | 0.9300   |
| C(20)-N(2)    | 1.378(2) |
| C(20)-C(21)   | 1.429(3) |
| C(21)-C(22)   | 1.357(3) |
| C(21)-H(21)   | 0.9300   |

|               |          |
|---------------|----------|
| C(22)-C(23)   | 1.428(3) |
| C(22)-H(22)   | 0.9300   |
| C(23)-N(2)    | 1.376(3) |
| C(23)-C(13)#1 | 1.399(3) |
| C(24)-O(1)    | 1.446(3) |
| C(24)-H(24A)  | 0.9600   |
| C(24)-H(24B)  | 0.9600   |
| C(24)-H(24C)  | 0.9600   |
| O(3)-H(3B)    | 0.976(9) |
| O(3)-H(3A)    | 1.054(9) |

|                   |            |
|-------------------|------------|
| O(2)-C(1)-O(1)    | 123.5(2)   |
| O(2)-C(1)-C(2)    | 124.1(2)   |
| O(1)-C(1)-C(2)    | 112.38(19) |
| C(3)-C(2)-C(7)    | 119.42(18) |
| C(3)-C(2)-C(1)    | 121.9(2)   |
| C(7)-C(2)-C(1)    | 118.65(19) |
| C(4)-C(3)-C(2)    | 120.2(2)   |
| C(4)-C(3)-H(3)    | 119.9      |
| C(2)-C(3)-H(3)    | 119.9      |
| C(3)-C(4)-C(5)    | 120.74(19) |
| C(3)-C(4)-H(4)    | 119.6      |
| C(5)-C(4)-H(4)    | 119.6      |
| C(4)-C(5)-C(6)    | 118.79(18) |
| C(4)-C(5)-C(8)    | 119.65(18) |
| C(6)-C(5)-C(8)    | 121.53(19) |
| C(7)-C(6)-C(5)    | 120.5(2)   |
| C(7)-C(6)-H(6)    | 119.7      |
| C(5)-C(6)-H(6)    | 119.7      |
| C(6)-C(7)-C(2)    | 120.3(2)   |
| C(6)-C(7)-H(7)    | 119.8      |
| C(2)-C(7)-H(7)    | 119.8      |
| C(20)-C(8)-C(9)   | 125.34(18) |
| C(20)-C(8)-C(5)   | 116.46(17) |
| C(9)-C(8)-C(5)    | 117.99(18) |
| N(1)-C(9)-C(8)    | 126.18(19) |
| N(1)-C(9)-C(10)   | 111.04(18) |
| C(8)-C(9)-C(10)   | 122.78(18) |
| C(11)-C(10)-C(9)  | 106.50(19) |
| C(11)-C(10)-H(10) | 126.8      |
| C(9)-C(10)-H(10)  | 126.8      |
| C(10)-C(11)-C(12) | 106.62(19) |
| C(10)-C(11)-H(11) | 126.7      |
| C(12)-C(11)-H(11) | 126.7      |

|                     |            |
|---------------------|------------|
| N(1)-C(12)-C(13)    | 125.71(18) |
| N(1)-C(12)-C(11)    | 110.82(17) |
| C(13)-C(12)-C(11)   | 123.45(19) |
| C(23)#1-C(13)-C(12) | 125.17(19) |
| C(23)#1-C(13)-C(14) | 116.52(18) |
| C(12)-C(13)-C(14)   | 118.31(18) |
| C(19)-C(14)-C(15)   | 118.7(2)   |
| C(19)-C(14)-C(13)   | 119.8(2)   |
| C(15)-C(14)-C(13)   | 121.4(2)   |
| C(16)-C(15)-C(14)   | 120.5(3)   |
| C(16)-C(15)-H(15)   | 119.8      |
| C(14)-C(15)-H(15)   | 119.8      |
| C(17)-C(16)-C(15)   | 120.3(3)   |
| C(17)-C(16)-H(16)   | 119.9      |
| C(15)-C(16)-H(16)   | 119.9      |
| C(16)-C(17)-C(18)   | 120.0(2)   |
| C(16)-C(17)-H(17)   | 120.0      |
| C(18)-C(17)-H(17)   | 120.0      |
| C(17)-C(18)-C(19)   | 119.9(3)   |
| C(17)-C(18)-H(18)   | 120.0      |
| C(19)-C(18)-H(18)   | 120.0      |
| C(18)-C(19)-C(14)   | 120.6(3)   |
| C(18)-C(19)-H(19)   | 119.7      |
| C(14)-C(19)-H(19)   | 119.7      |
| N(2)-C(20)-C(8)     | 126.04(18) |
| N(2)-C(20)-C(21)    | 106.87(18) |
| C(8)-C(20)-C(21)    | 126.93(18) |
| C(22)-C(21)-C(20)   | 108.20(18) |
| C(22)-C(21)-H(21)   | 125.9      |
| C(20)-C(21)-H(21)   | 125.9      |
| C(21)-C(22)-C(23)   | 108.28(19) |
| C(21)-C(22)-H(22)   | 125.9      |
| C(23)-C(22)-H(22)   | 125.9      |
| N(2)-C(23)-C(13)#1  | 126.71(18) |
| N(2)-C(23)-C(22)    | 106.94(18) |
| C(13)#1-C(23)-C(22) | 126.20(19) |
| O(1)-C(24)-H(24A)   | 109.5      |
| O(1)-C(24)-H(24B)   | 109.5      |
| H(24A)-C(24)-H(24B) | 109.5      |
| O(1)-C(24)-H(24C)   | 109.5      |
| H(24A)-C(24)-H(24C) | 109.5      |
| H(24B)-C(24)-H(24C) | 109.5      |
| C(9)-N(1)-C(12)     | 105.00(16) |
| C(23)-N(2)-C(20)    | 109.69(16) |

|                  |            |
|------------------|------------|
| C(1)-O(1)-C(24)  | 115.23(19) |
| H(3B)-O(3)-H(3A) | 122.2(16)  |

---

Symmetry transformations used to generate equivalent atoms: #1  $-x+2, -y, -z+1$

Table S3. Anisotropic displacement parameters ( $\text{\AA}^2 \times 10^3$ ).

|       | U11     | U22   | U33    | U23    | U13     | U12    |
|-------|---------|-------|--------|--------|---------|--------|
| C(1)  | 29(1)   | 32(1) | 28(1)  | 7(1)   | 6(1)    | 14(1)  |
| C(2)  | 25(1)   | 25(1) | 19(1)  | 2(1)   | 4(1)    | 10(1)  |
| C(3)  | 28(1)   | 20(1) | 26(1)  | 0(1)   | 1(1)    | 7(1)   |
| C(4)  | 20(1)   | 24(1) | 25(1)  | -2(1)  | -1(1)   | 5(1)   |
| C(5)  | 23(1)   | 23(1) | 19(1)  | 3(1)   | 3(1)    | 9(1)   |
| C(6)  | 24(1)   | 22(1) | 32(1)  | 4(1)   | 4(1)    | 5(1)   |
| C(7)  | 20(1)   | 30(1) | 33(1)  | 5(1)   | 3(1)    | 5(1)   |
| C(8)  | 19(1)   | 21(1) | 24(1)  | 3(1)   | 2(1)    | 6(1)   |
| C(9)  | 24(1)   | 21(1) | 23(1)  | 2(1)   | 4(1)    | 8(1)   |
| C(10) | 31(1)   | 34(1) | 25(1)  | 4(1)   | 7(1)    | 18(1)  |
| C(11) | 34(1)   | 32(1) | 23(1)  | 1(1)   | 7(1)    | 15(1)  |
| C(12) | 24(1)   | 22(1) | 22(1)  | 2(1)   | 3(1)    | 7(1)   |
| C(13) | 23(1)   | 24(1) | 22(1)  | 0(1)   | 2(1)    | 5(1)   |
| C(14) | 30(1)   | 32(1) | 19(1)  | -1(1)  | 0(1)    | 13(1)  |
| C(15) | 37(1)   | 49(2) | 24(1)  | 6(1)   | 4(1)    | 12(1)  |
| C(16) | 55(2)   | 67(2) | 24(1)  | 8(1)   | 11(1)   | 24(2)  |
| C(17) | 70(2)   | 60(2) | 20(1)  | -7(1)  | 0(1)    | 24(2)  |
| C(18) | 56(2)   | 57(2) | 36(2)  | -13(1) | -4(1)   | 3(2)   |
| C(19) | 40(1)   | 46(2) | 31(1)  | -7(1)  | 5(1)    | 4(1)   |
| C(20) | 20(1)   | 21(1) | 24(1)  | 2(1)   | 1(1)    | 6(1)   |
| C(21) | 25(1)   | 32(1) | 25(1)  | 0(1)   | -4(1)   | 12(1)  |
| C(22) | 26(1)   | 37(1) | 22(1)  | 0(1)   | -4(1)   | 12(1)  |
| C(23) | 21(1)   | 24(1) | 21(1)  | 1(1)   | 0(1)    | 4(1)   |
| C(24) | 48(2)   | 33(1) | 58(2)  | 16(1)  | 16(1)   | 25(1)  |
| N(1)  | 22(1)   | 21(1) | 21(1)  | 2(1)   | 2(1)    | 7(1)   |
| N(2)  | 21(1)   | 20(1) | 22(1)  | 0(1)   | 3(1)    | 6(1)   |
| O(1)  | 36(1)   | 26(1) | 48(1)  | 8(1)   | 6(1)    | 17(1)  |
| O(2)  | 33(1)   | 44(1) | 63(1)  | 7(1)   | -12(1)  | 16(1)  |
| O(3)  | 850(20) | 81(4) | 210(7) | -6(5)  | 118(12) | 137(8) |



Table S4. Hydrogen coordinates ( $\times 10^4$ ) and isotropic displacement parameters ( $\text{\AA}^2 \times 10^3$ ).

|        | x        | y        | z        | U(eq)  |
|--------|----------|----------|----------|--------|
| H(3)   | 3557     | 4706     | 4144     | 31     |
| H(4)   | 6045     | 3529     | 4606     | 29     |
| H(6)   | 1347     | 1057     | 3671     | 32     |
| H(7)   | -1137    | 2235     | 3195     | 33     |
| H(10)  | 5173     | 2621     | 6380     | 35     |
| H(11)  | 7903     | 2477     | 8031     | 35     |
| H(15)  | 8913     | 970      | 9248     | 44     |
| H(16)  | 9645     | 1818     | 11034    | 57     |
| H(17)  | 12749    | 2976     | 11762    | 62     |
| H(18)  | 15131    | 3310     | 10701    | 65     |
| H(19)  | 14388    | 2485     | 8905     | 49     |
| H(21)  | 3742     | 1020     | 2174     | 34     |
| H(22)  | 5387     | -270     | 1102     | 36     |
| H(24A) | -877     | 6821     | 3745     | 66     |
| H(24B) | -2781    | 5930     | 3667     | 66     |
| H(24C) | -1904    | 6065     | 2636     | 66     |
| H(3B)  | 7430(30) | 4690(20) | 8588(12) | 15(6)  |
| H(3A)  | 8530(40) | 4640(30) | 9987(12) | 65(11) |

Table S5. UV-Vis spectra data of six porphyrin derivatives I-VI.

| Compd | Soret band, nm                                         |            | Q bands, nm                                            |            |            |
|-------|--------------------------------------------------------|------------|--------------------------------------------------------|------------|------------|
|       | $(\epsilon \times 10^5, \text{M}^{-1} \text{cm}^{-1})$ |            | $(\epsilon \times 10^4, \text{M}^{-1} \text{cm}^{-1})$ |            |            |
| I     | 416 (1.83)                                             | 514 (1.67) | 549 (0.81)                                             | 590 (0.5)  | 645 (0.52) |
| II    | 418 (1.38)                                             | 515 (0.71) | 550 (0.33)                                             | 590 (0.22) | 645 (0.2)  |
| III   | 418 (1.8)                                              | 515 (1.38) | 550 (0.66)                                             | 591 (0.43) | 646 (0.35) |
| IV    | 418 (1.8)                                              | 515 (1.42) | 550 (0.66)                                             | 591 (0.45) | 646 (0.35) |
| V     | 419 (1.53)                                             | 516 (0.89) | 550 (0.41)                                             | 590 (0.27) | 646 (0.22) |
| VI    | 419 (1.23)                                             | 516 (0.68) | 550 (0.31)                                             | 591 (0.21) | 646 (0.16) |

Table S6. Comparison of NLO coefficients with previously reported porphyrin derivatives.

| Compound                                                                                      | Laser parameters         | $\beta$<br>(m W <sup>-1</sup> ) | $\gamma$<br>(m <sup>2</sup> W <sup>-1</sup> ) | $\chi^{(3)}$<br>(esu)  | F <sub>oL</sub><br>(J cm <sup>-2</sup> ) | ref    |
|-----------------------------------------------------------------------------------------------|--------------------------|---------------------------------|-----------------------------------------------|------------------------|------------------------------------------|--------|
| III                                                                                           | 532 nm, 7 ns,<br>10 Hz   | $3.7 \times 10^{-9}$            | $-17 \times 10^{-17}$                         | $17.9 \times 10^{-11}$ | 0.11                                     | T<br>W |
| <i>meso</i> -tetrakis(2,3,5,6-tetrafluoro-N,N-dimethyl-4-aniliny)porphyrin                    | 532 nm, 7 ns,<br>10 Hz   | $0.32 \times 10^{-9}$           | -                                             | $7.9 \times 10^{-12}$  | -                                        | S1     |
| Fluorinated trans-dicationic pyridinium porphyrin                                             | 532 nm, 7 ns,<br>10 Hz   | $75 \times 10^{-8}$             | -                                             | -                      | 1.27                                     | S2     |
| Cu-porphyrin                                                                                  | 532 nm, 6 ns,<br>10 Hz   | $132 \times 10^{-8}$            | -                                             | -                      | 1.7                                      | S3     |
| Zincporphyrin                                                                                 | 532 nm, 21 ps,<br>1 Hz   | $5.8 \times 10^{-9}$            | $55 \times 10^{-17}$                          | $4.76 \times 10^{-10}$ | -                                        | S4     |
| 4,40-((porphyrin-5,15-diylbis(4,1-phenylene))bis(ethyne-2,1-diyl))bis(N,Ndihexadecyl aniline) | 532 nm, 21 ps            | $6.8 \times 10^{-12}$           | $1.2 \times 10^{-19}$                         | $1.60 \times 10^{-13}$ | -                                        | S5     |
| Tetra tolyl porphyrins                                                                        | 532 nm, 35 ps,<br>10 Hz  | -                               | -                                             | $10^{-12}$             | -                                        | S6     |
| Tetraphenyl-porphyrin film                                                                    | 532 nm, 30 ps,<br>10 Hz, | $10^{-6}$                       | $10^{-13}$                                    | $10^{-16}$             | -                                        | S7     |
| ZnPor-PMMA                                                                                    | 532 nm, 21 ps,<br>1 Hz   | $4 \times 10^{-9}$              | $12 \times 10^{-17}$                          | $1.64 \times 10^{-10}$ | -                                        | S4     |
| ZnCu-Por-COF                                                                                  | 532 nm, 6 ns,<br>10 Hz   | $4470 \times 10^{-8}$           | -                                             | -                      | -                                        | S8     |
| Graphene-copper porphyrin                                                                     | 532 nm, 6 ns,<br>10 Hz   | $4720 \times 10^{-8}$           | -                                             | $8.5 \times 10^{-12}$  | 0.1                                      | S8     |
| C60/porphyrin film                                                                            | 532 nm, 8 ns,<br>1 Hz    | $-6.99 \times 10^{-6}$          | $-2.96 \times 10^{-12}$                       | -                      | -                                        | S9     |

TW: This work

- S1 N. S. Narendran, R. Soman, C. Arunkumar and K. Chandrasekharan, *Spectrochimica Acta Part A Molecular & Biomolecular Spectroscopy*, 2015, **136**, 838-844.
- S2 M. V. Vijisha, J. Ramesh, C. Arunkumar and K. Chandrasekharan, *Optical Materials*, 2019, **98**, 109474.
- S3 M. Krishna, V. P. Kumar, N. Venkatramaiah, R. Venkatesan and D. N. Rao, *Applied Physics Letters*, 2011, **98**, 666.
- S4 N. Qiu, D. Liu, S. Han, X. He, G. Cui and Q. Duan, *Journal of Photochemistry & Photobiology A Chemistry*, 2013, **272**, 65-72.
- S5 Xiong, Liu, Dong, Wang, Hong, Gao, Zhou, Yang, Yan and Xing, *Dyes & Pigments*, 2016, **134**, 155-163.
- S6 S. V. Rao, N. Srinivas, D. N. Rao, L. Giribabu, B. G. Maiya, R. Philip and G. R. Kumar, *Optics Communications*, 2000, **182**, 255-264.
- S7 L.M. Clavian, P.C. Rajesh Kumar, K.V. Anil Kumar, D. Narayana Rao, N.K. Shihab, Sanjeev Ganesh, *Optics & Laser Technology*, 2019, **119**, 105642.
- S8 B. P. Biswal, S. Valligatla, N. A. Saad, M. B. M. K. Mariserla, M. Wang, N. Chandrasekhar, D. Becker, M. Addicoat, I. Senkovska, R. Berger, D. N. Rao, S. Kaskel, X. Feng and T. Banerjee, *Angewandte Chemie (International ed. in English)*, 2019, **58**, 6896-6900.
- S9 L. J. A, Q. C. A, Q. O. A, H. L. B, Y. W. A, X. Z. A, Y. S. A and Y. L. B, *Chemical Physics*, 2006, **324**, 556-562.
